# Supplementary material
Source: publisher figshare collection journal article supplement (https://acs.figshare.com/ndownloader/files/11869298)
Supplement: Supplementary file 1 [file 11869298]

*Supporting information for*

**Electrochemically Switchable Polymeric Membrane Ion-Selective Electrodes**

*Elena Zdrachek, Eric Bakker\**

Department of Inorganic and Analytical Chemistry, University of Geneva,

Quai Ernest-Ansermet 30, CH-1211 Geneva, Switzerland.

Corresponding Author: [eric.bakker@unige.ch](mailto:eric.bakker@unige.ch)

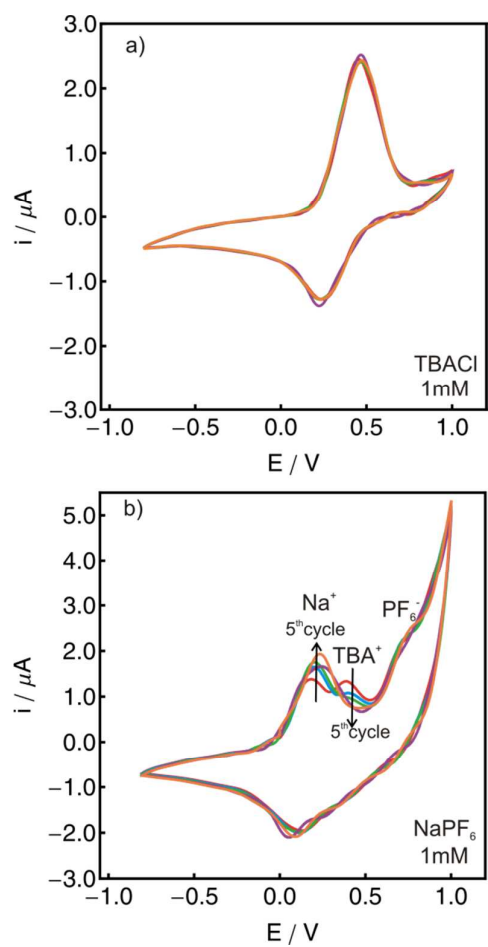

**Figure S1.** (a) Cyclic voltammograms in 1mM TBACl. (b) Cyclic voltammograms in 1mM NaPF<sub>6</sub>. Scan rate: 100 mV·s<sup>-1</sup>.

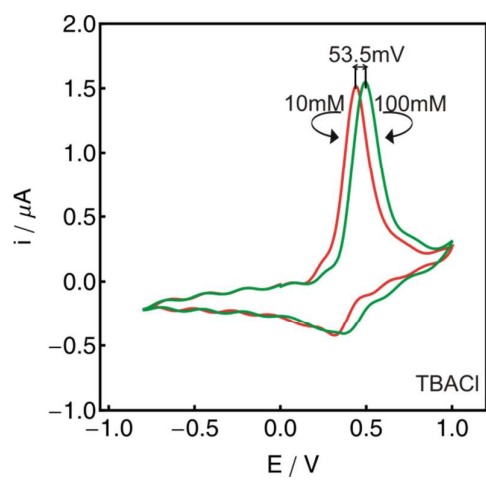

**Figure S2.** Cyclic voltammograms in 10mM and 100mM TBACl. Scan rate:  $100 \text{ mV} \cdot \text{s}^{-1}$ .

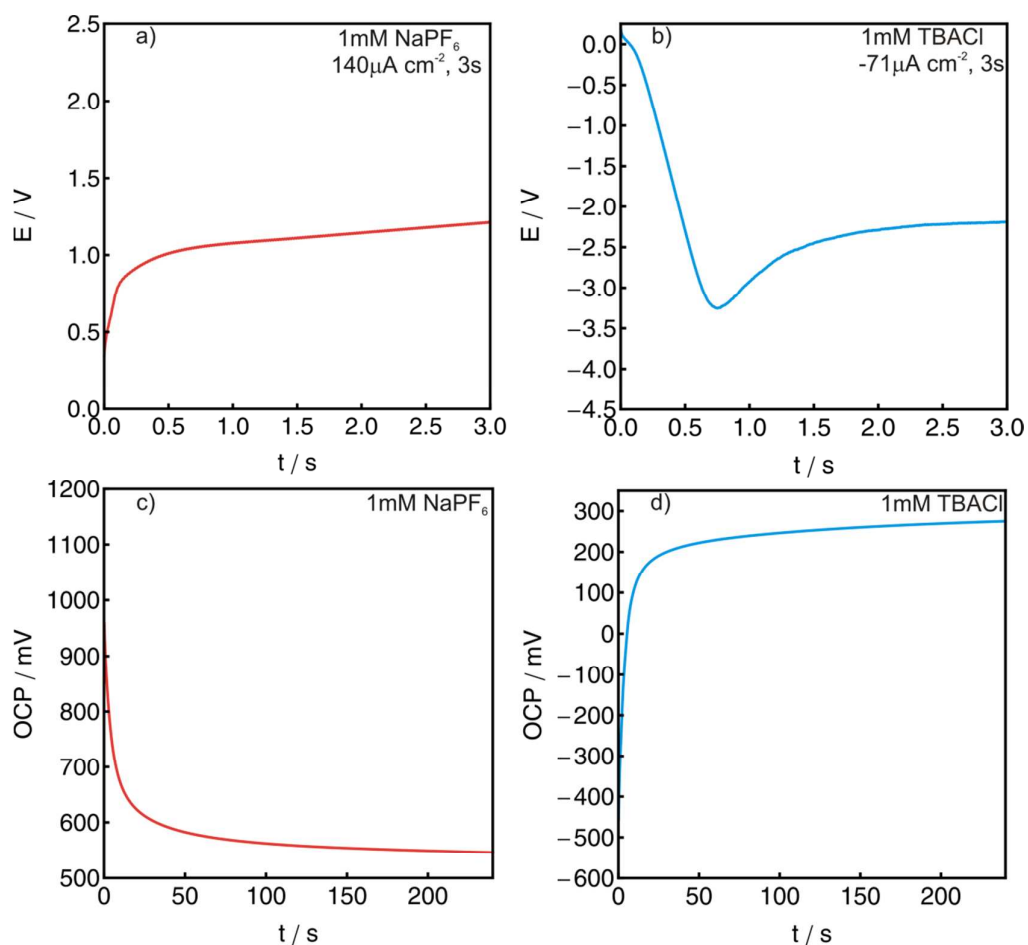

**Figure S3.** (a) Potential change as a function of time for electrode 1 in 1mM NaPF<sub>6</sub> solution resulting from applying oxidation current of 140  $\mu A \cdot cm^{-2}$  for 3 s and (b) potential change as a function of time for electrode 1 in 1mM TBACl solution resulting from applying reduction current of -71  $\mu A \cdot cm^{-2}$  for 3 s. (c) Open circuit potential as a function of time for electrode 1 in 1mM NaPF<sub>6</sub> solution. (d) Open circuit potential as a function of time for electrode 1 in 1mM TBACl solution.

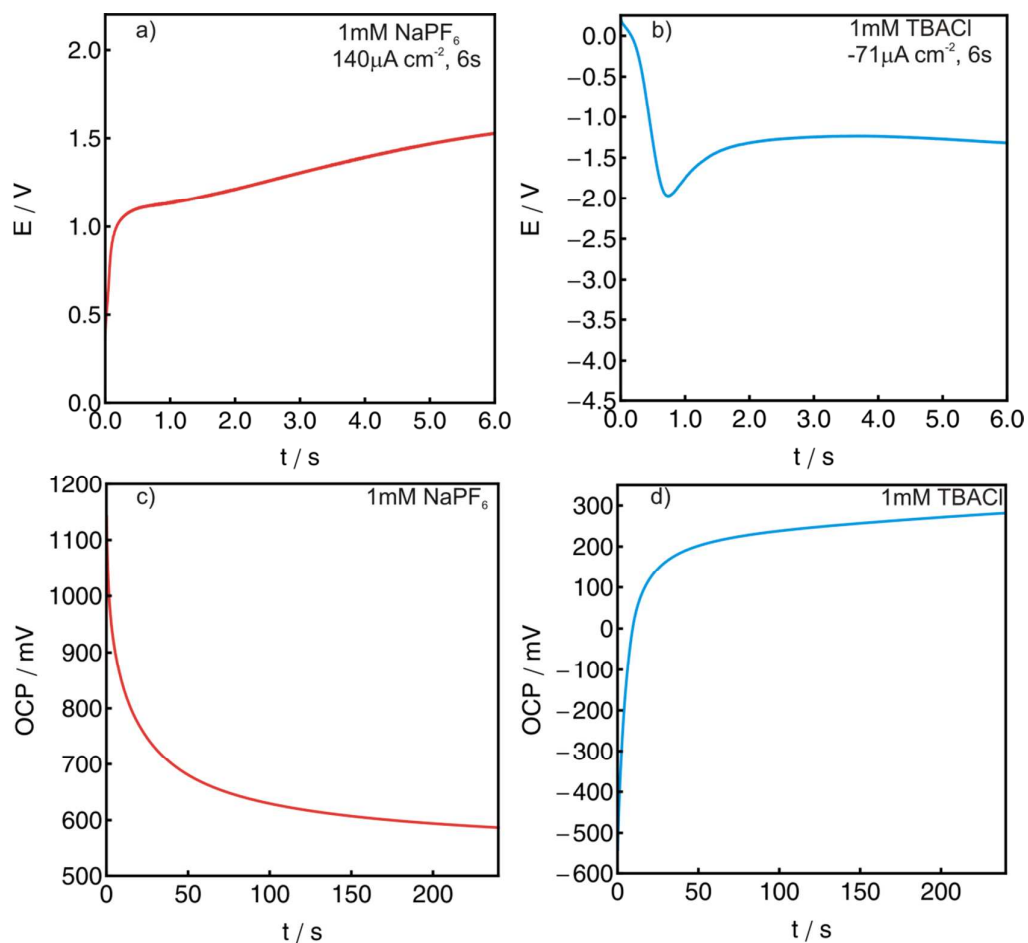

**Figure S4.** (a) Potential change as a function of time for electrode 2 in 1mM NaPF<sub>6</sub> solution resulting from applying oxidation current of 140  $\mu A \cdot cm^{-2}$  for 6 s and (b) Potential change as a function of time for electrode 2 in 1mM TBACl solution resulting from applying reduction current of -71  $\mu A \cdot cm^{-2}$  for 6 s. (c) Open circuit potential as a function of time for electrode 2 in 1mM NaPF<sub>6</sub> solution. (d) Open circuit potential as a function of time for electrode 2 in 1mM TBACl solution.

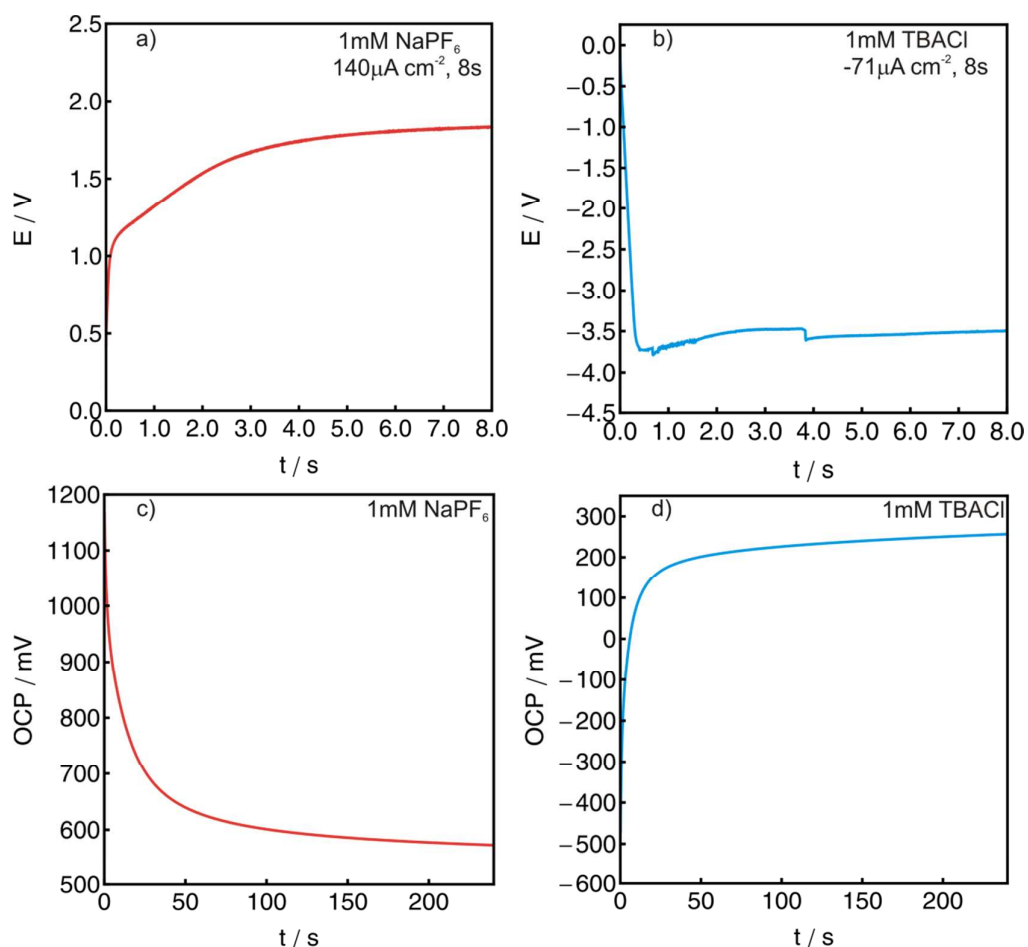

**Figure S5.** (a) Potential change as a function of time for electrode 3 in 1mM NaPF<sub>6</sub> solution resulting from applying oxidation current of 140  $\mu A \cdot cm^{-2}$  for 8 s and (b) Potential change as a function of time electrode 3 in 1mM TBACl solution resulting from applying reduction current of -71  $\mu A \cdot cm^{-2}$  for 8 s. (c) Open circuit potential as a function of time electrode 3 in 1mM NaPF<sub>6</sub> solution. (d) Open circuit potential as a function of time electrode 3 in 1mM TBACl solution.

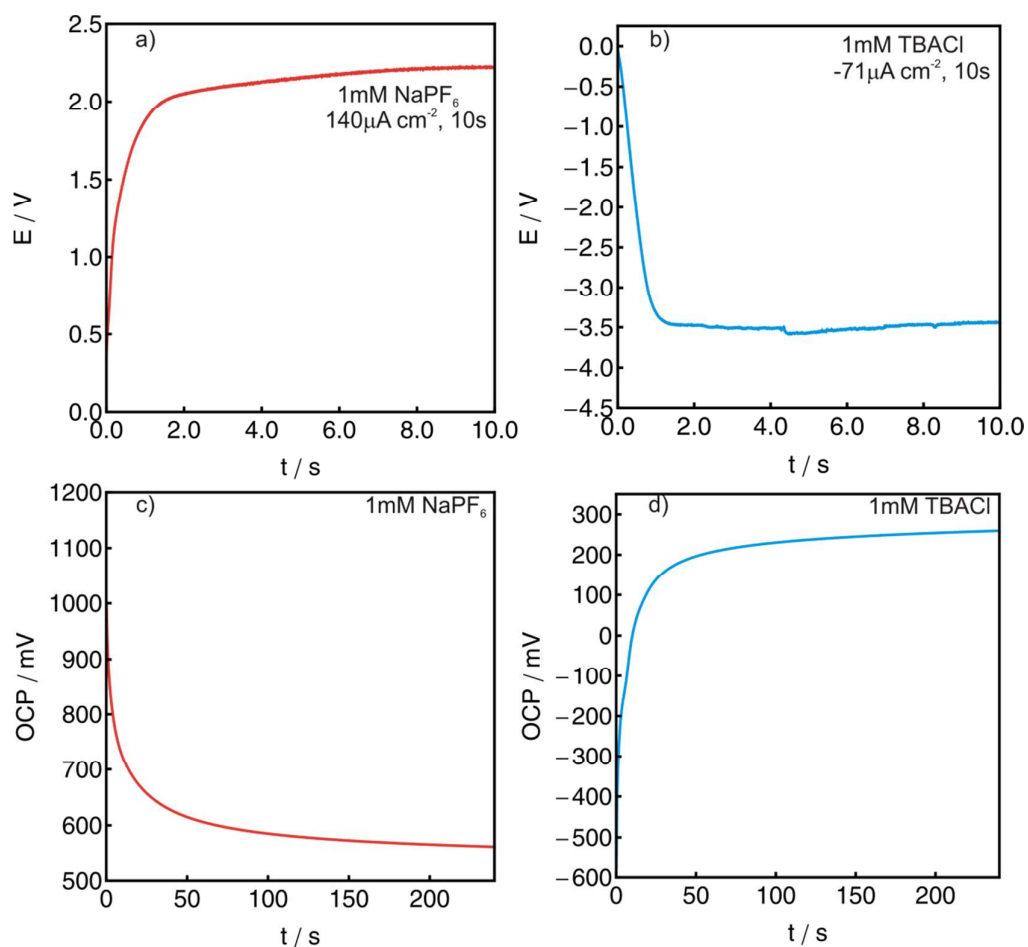

**Figure S6.** (a) Potential change as a function of time electrode 4 in 1mM  $\text{NaPF}_6$  solution resulting from applying oxidation current of  $140 \mu\text{A cm}^{-2}$  for 10s and (b) Potential change as a function of time electrode 4 in 1mM TBACl solution resulting from applying reduction current of  $-71 \mu\text{A cm}^{-2}$  for 10 s. (c) Open circuit potential as a function of time electrode 4 in 1mM  $\text{NaPF}_6$  solution. (d) Open circuit potential as a function of time electrode 4 in 1mM TBACl solution.

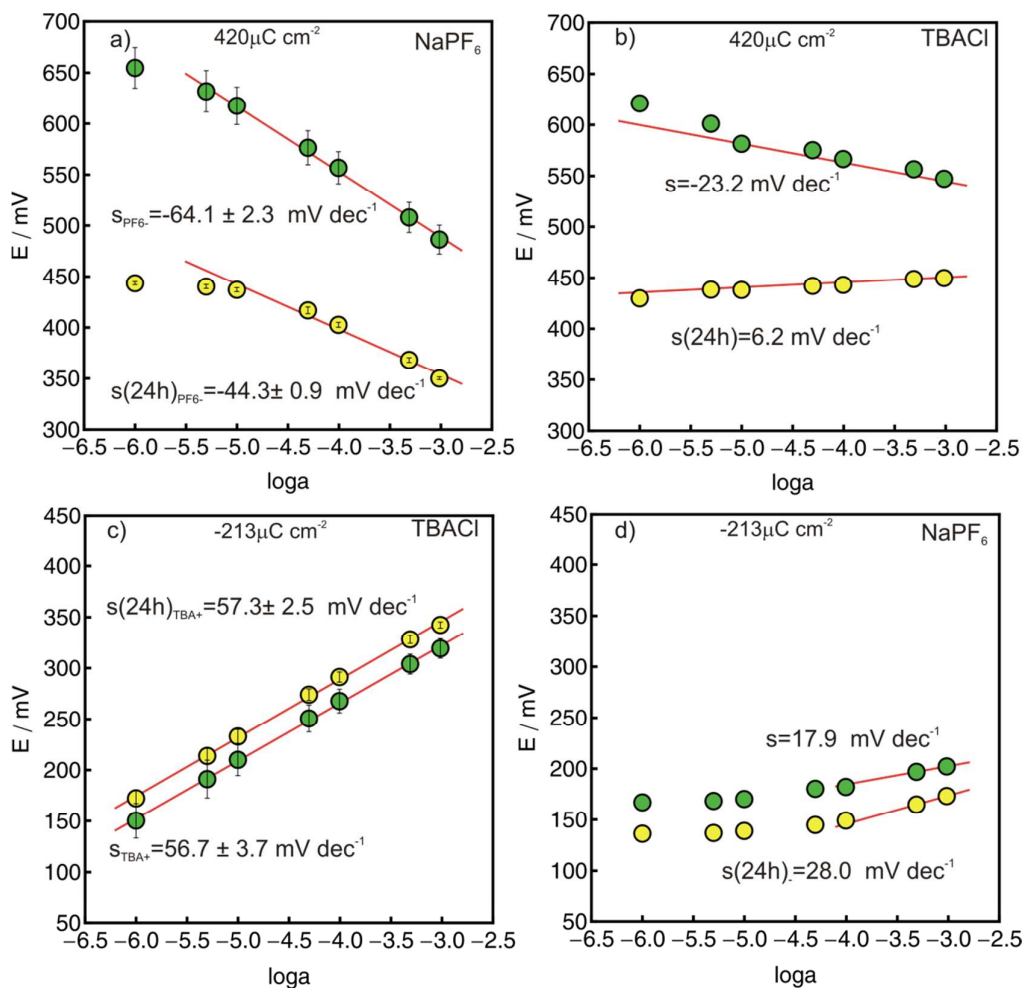

**Figure S7.** Potentiometric responses of electrode 1 in (a) NaPF<sub>6</sub> and (b) TBACl solutions after applying oxidation current of 140  $\mu\text{A}\cdot\text{cm}^{-2}$  for 3 s and in (c) TBACl and (d) NaPF<sub>6</sub> solutions after applying reduction current of -71  $\mu\text{A}\cdot\text{cm}^{-2}$  for 3 s. Error bars are standard deviations ( $n = 3$ ).



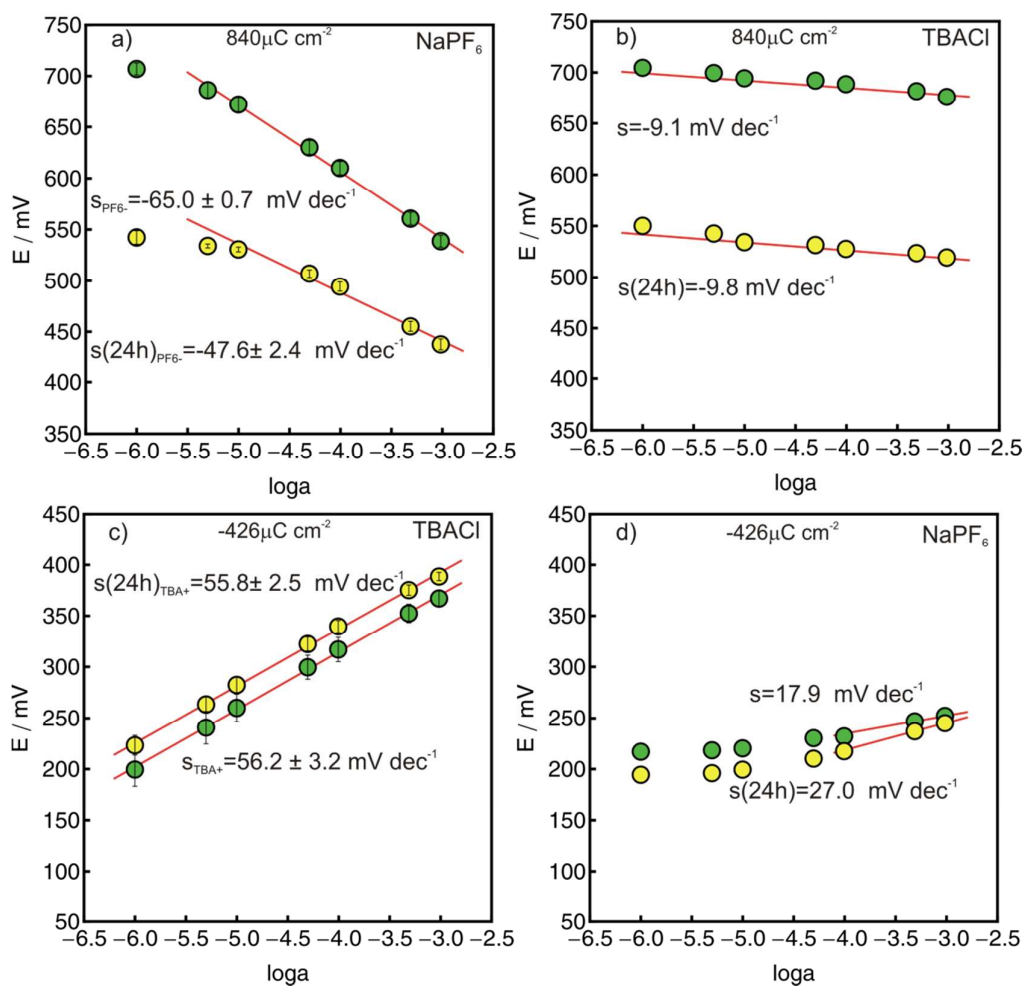

**Figure S8.** Potentiometric responses of electrode 2 in (a)  $\text{NaPF}_6$  and (b)  $\text{TBACl}$  solutions after applying oxidation current of  $140 \mu\text{A}\cdot\text{cm}^{-2}$  for 6 s and in (c)  $\text{TBACl}$  and (d)  $\text{NaPF}_6$  solutions after applying reduction current of  $-71 \mu\text{A}\cdot\text{cm}^{-2}$  for 6 s. Error bars are standard deviations ( $n = 3$ ).

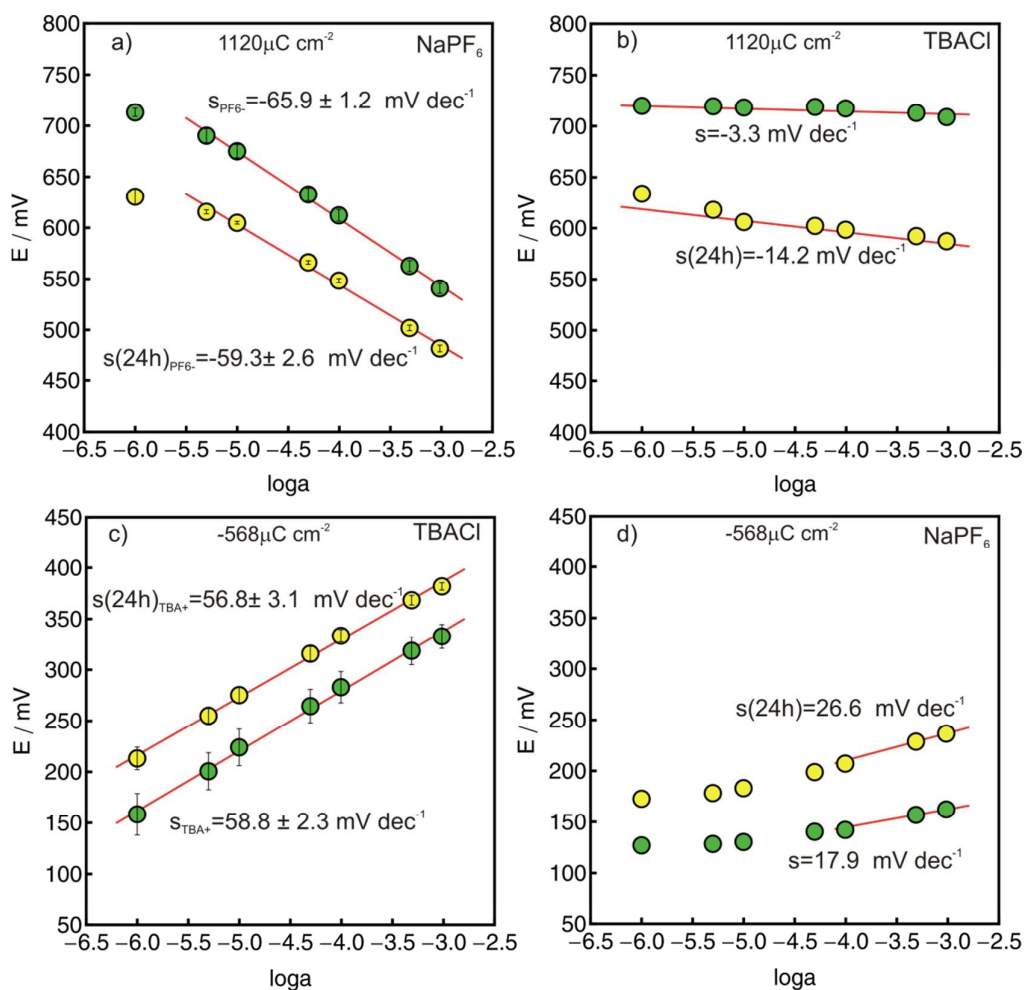

**Figure S9.** Potentiometric responses of electrode 3 in (a) NaPF<sub>6</sub> and (b) TBACl solutions after applying oxidation current of  $140 \mu\text{A}\cdot\text{cm}^{-2}$  for 8 s and in (c) TBACl and (d) NaPF<sub>6</sub> solutions after applying reduction current of  $-71 \mu\text{A}\cdot\text{cm}^{-2}$  for 8 s. Error bars are standard deviations ( $n = 3$ ).

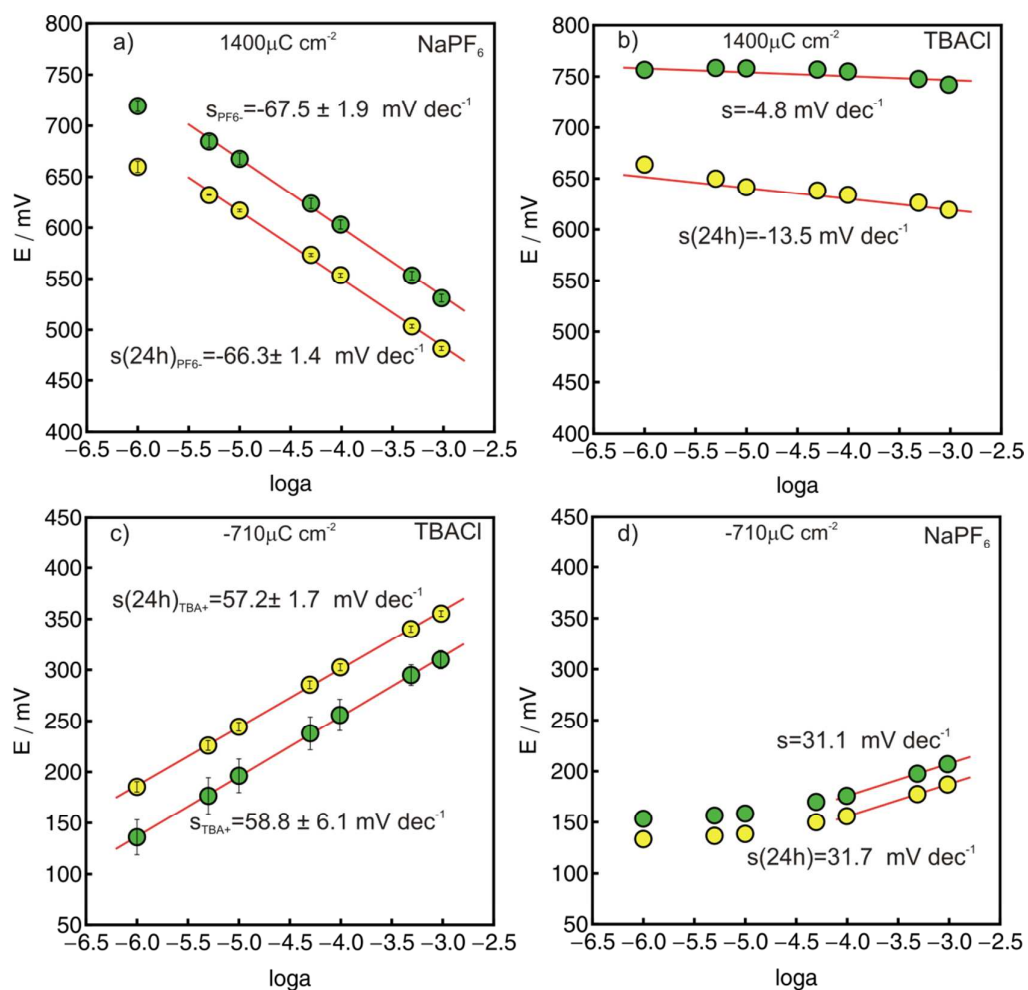

**Figure S10.** Potentiometric responses of electrode 4 in (a) NaPF<sub>6</sub> and (b) TBACl solutions after applying an oxidation current of 140 μA·cm<sup>-2</sup> for 10 s and in (c) TBACl and (d) NaPF<sub>6</sub> solutions after applying reduction current of -71 μA·cm<sup>-2</sup> for 10 s. Error bars are standard deviations (n = 3).

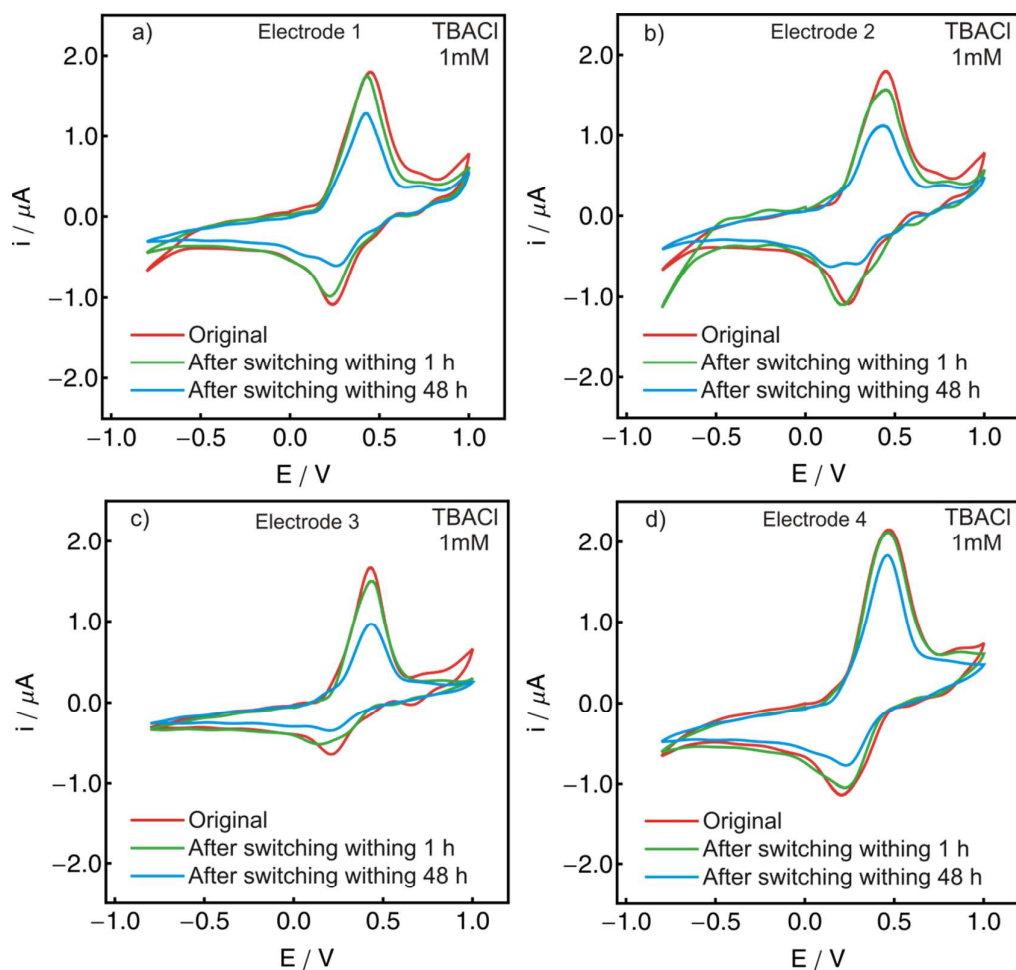

**Figure S11.** Cyclic voltammograms observed in 1mM TBACl solution before and after switching between cationic and anionic response for (a) electrode 1, (b) electrode 2, (c) electrode 3 and (d) electrode 4. Scan rate:  $100 \text{ mV} \cdot \text{s}^{-1}$ .

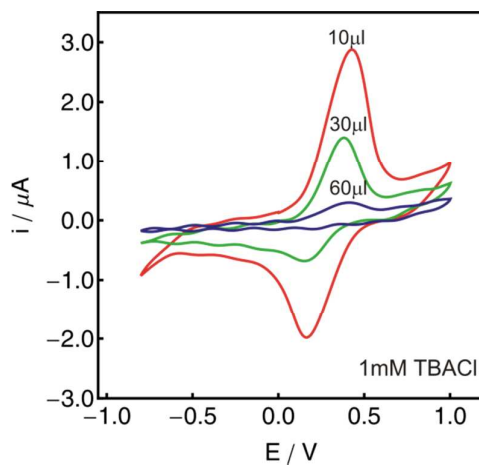

**Figure S12.** Cyclic voltammograms observed in 1mM TBACl solution for electrodes with 10, 30 and 60 μL of drop-cast POT solution. Scan rate: 100 mV·s<sup>-1</sup>

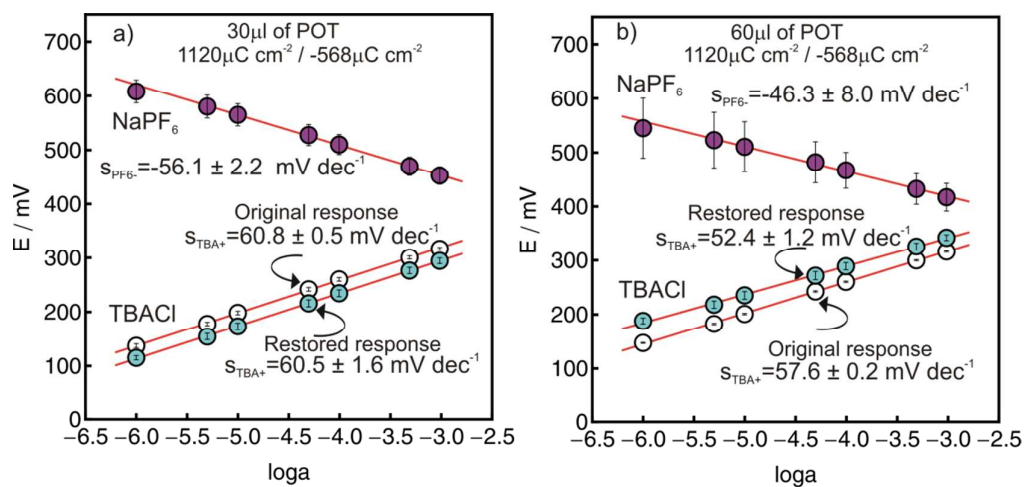

**Figure S13.** Potentiometric responses in NaPF<sub>6</sub> and TBACl solutions before and after applying oxidation/reduction current pulses of 140 μA cm<sup>-2</sup>/–71 μA cm<sup>-2</sup> for 8 s to electrodes with (a) 30 μL and (b) 60 μL of drop-cast POT solution. Error bars are standard deviations (n = 3).

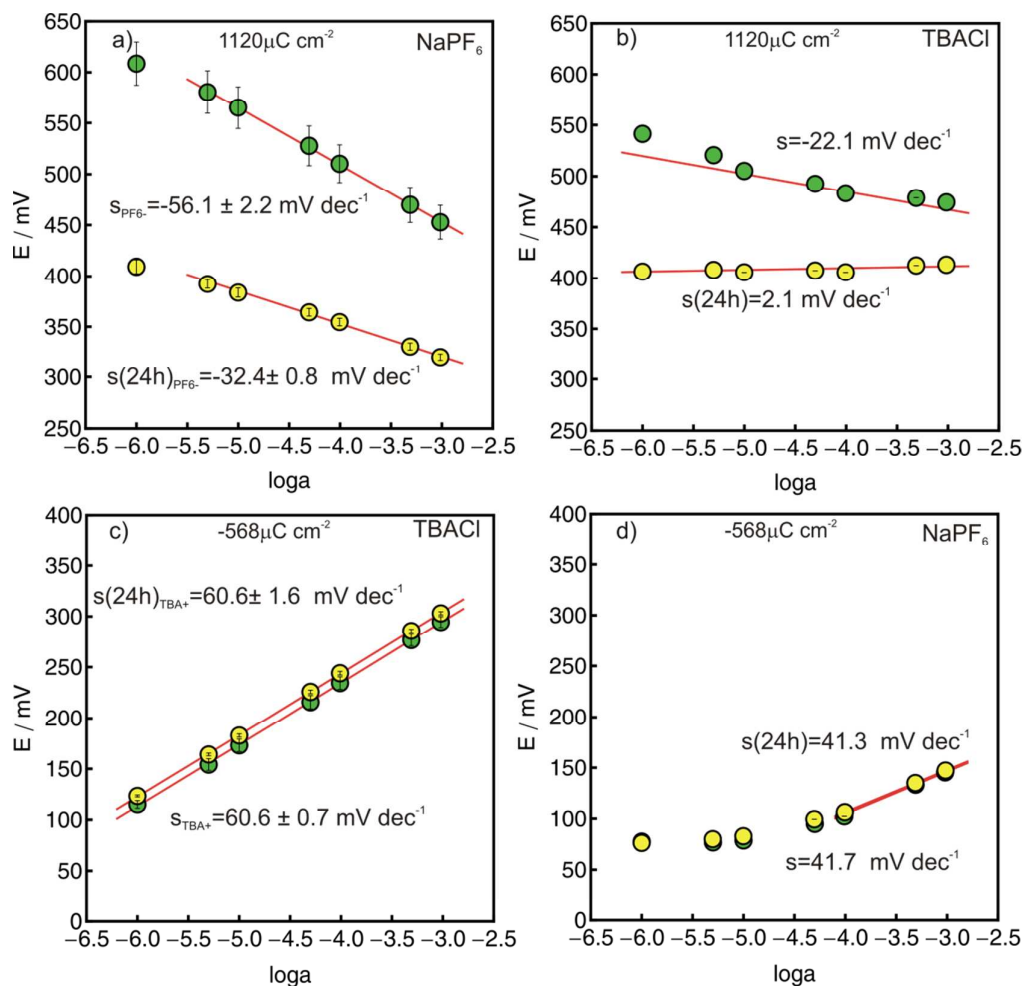

**Figure S14.** Potentiometric responses of electrode with 30  $\mu\text{L}$  of drop-cast POT solution in (a) NaPF<sub>6</sub> and (b) TBACl solutions after applying oxidation current of 140  $\mu\text{A cm}^{-2}$  for 8 s and in (c) TBACl and (d) NaPF<sub>6</sub> solutions after applying reduction current of -71  $\mu\text{A cm}^{-2}$  for 8 s. Error bars are standard deviations ( $n = 3$ ).

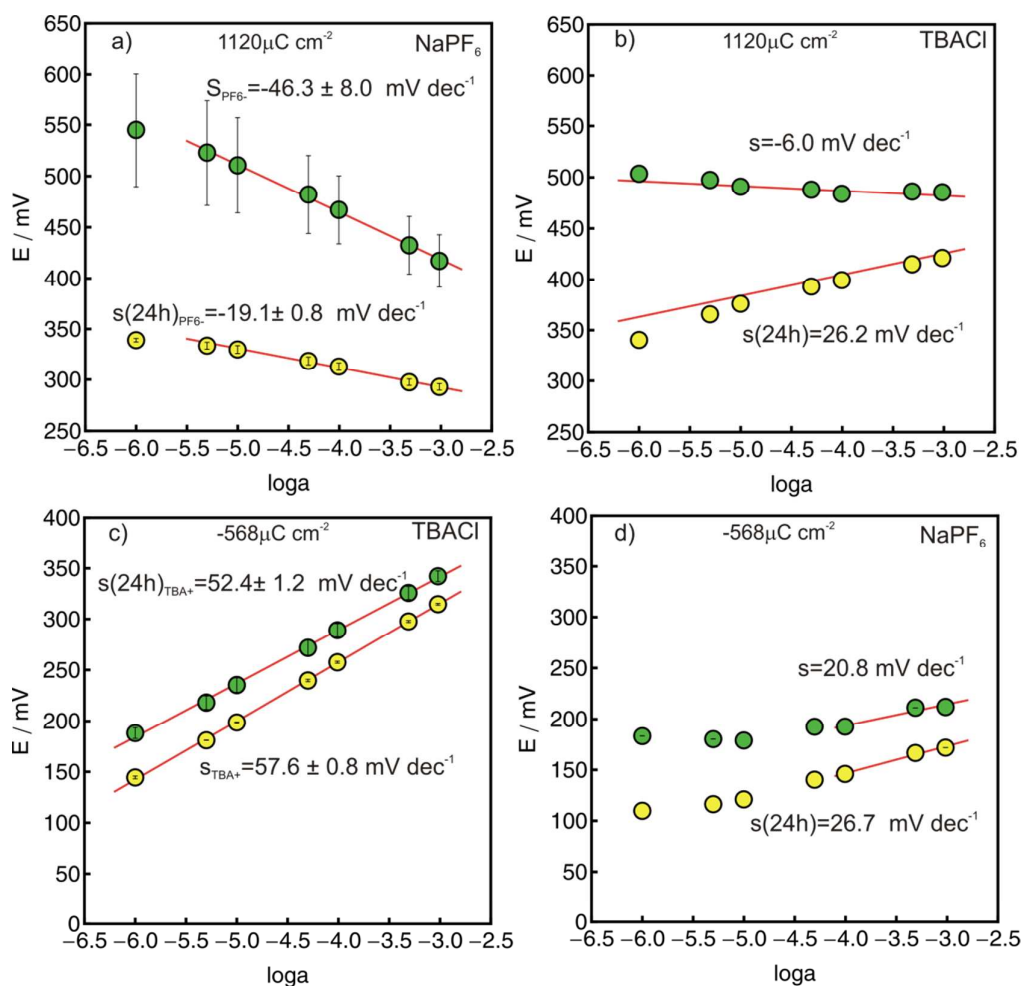

**Figure S15.** Potentiometric responses of electrode with 60  $\mu\text{L}$  of drop-cast POT solution in (a)  $\text{NaPF}_6$  and (b)  $\text{TBACl}$  solutions after applying oxidation current of  $140 \mu\text{A}\cdot\text{cm}^{-2}$  for 8 s and in (c)  $\text{TBACl}$  and (d)  $\text{NaPF}_6$  solutions after applying reduction current of  $-71 \mu\text{A}\cdot\text{cm}^{-2}$  for 8 s. Error bars are standard deviations ( $n = 3$ ).
